# Supplementary material for: Single human B cell-derived monoclonal anti-Candida antibodies enhance phagocytosis and protect against disseminated candidiasis
Source: PubMed Central journal article supplement (PMC6290022; doi:10.1038/s41467-018-07738-1), 2018-12-11
Supplement: 41467_2018_7738_MOESM3_ESM.pdf [file 41467_2018_7738_MOESM3_ESM.pdf]

## Description of Additional Supplementary Files

File Name: Supplementary Movie 1

Description: Macrophage phagocytosis of live *C. albicans* cells pre-incubated with AB119. Movie shows J774.1 macrophages (stained magenta) phagocytosing live wild-type *C. albicans* yeast cells (stained green) which had been pre-incubated with AB119. Movie captures the first 60 min of the interaction. Scale bar = 13  $\mu\text{m}$ .

File Name: Supplementary Movie 2

Description: Macrophage phagocytosis of live *C. albicans* cells pre-incubated with AB140. Movie shows J774.1 macrophages (stained magenta) phagocytosing live wild-type *C. albicans* yeast cells (stained green) which had been pre-incubated with AB140. Movie captures the first 60 min of the interaction. Scale bar = 13  $\mu\text{m}$ .

File Name: Supplementary Movie 3

Description: Macrophage phagocytosis of live *C. albicans* cells pre-incubated with AB120. Movie shows J774.1 macrophages (stained magenta) phagocytosing live wild-type *C. albicans* yeast cells (stained green) which had been pre-incubated with AB120. Movie captures the first 60 min of the interaction. Scale bar = 14  $\mu\text{m}$ .

File Name: Supplementary Movie 4

Description: Macrophage phagocytosis of live *C. albicans* cells pre-incubated with control IgG1 mAb. Movie shows J774.1 macrophages (stained magenta) phagocytosing live wildtype *C. albicans* yeast cells (stained green) which had been pre-incubated with control IgG1 mAb. Movie captures the first 60 min on the interaction. Scale bar = 11  $\mu\text{m}$ .

File Name: Supplementary Movie 5

Description: Macrophage phagocytosis of live *C. albicans* cells pre-incubated with saline control. Movie shows J774.1 macrophages (stained magenta) phagocytosing live wild-type *C. albicans* yeast cells (stained green) which had been pre-incubated with saline. Movie captures the first 60 min of the interaction. Scale bar = 17  $\mu\text{m}$ .

File Name: Supplementary Movie 6

Description: Macrophage phagocytosis of live *C. albicans* filamentous cells pre-incubated with saline control. Movie shows J774.1 macrophages (stained magenta) phagocytosing live wild-type *C. albicans* filamentous cells (stained green) which had been preincubated with saline. Movie captures the first 60 min of the interaction. Scale bar = 10  $\mu\text{m}$ .

File Name: Supplementary Movie 7

Description: Macrophage phagocytosis of live *C. albicans* filamentous cells pre-incubated with AB120. Movie shows J774.1 macrophages (stained magenta) phagocytosing live wild-type *C. albicans* filamentous cells (stained green) which had been pre-incubated with AB120. Movie captures the first 60 min of the interaction. Scale bar = 11  $\mu\text{m}$ .

File Name: Supplementary Movie 8

Description: Macrophage phagocytosis of live *C. auris* cells pre-incubated with AB119. Movie shows J774.1 macrophages (stained magenta) phagocytosing live wild-type *C. auris* cells

(stained green) which had been pre-incubated with AB119. Movie captures the first 60 min of the interaction. Scale bar = 17  $\mu$ m.

File Name: Supplementary Movie 9

Description: Macrophage phagocytosis of live *C. auris* cells pre-incubated with control IgG1 mAb. Movie shows J774.1 macrophages (stained magenta) phagocytosing live wildtype *C. auris* cells (stained green) which had been pre-incubated with control IgG1 mAb. Movie captures the first 60 min of the interaction. Scale bar = 17  $\mu$ m.
